CORRECTION

# Correction: An investigation into the epidemiology of chikungunya virus across neglected regions of Indonesia

The *PLOS Neglected Tropical Diseases* Staff

In the title of this article, there is a typographical error in the word “investigation”. The correct title is: An investigation into the epidemiology of chikungunya virus across neglected regions of Indonesia.

## Reference

1. Stubbs SCB, Johar E, Yudhaputri FA, Yohan B, Santoso MS, Hayati RF, et al. (2020) An investigation into the epidemiology of chikungunya virus across neglected regions of Indonesia. *PLoS Negl Trop Dis* 14(12): e0008934. <https://doi.org/10.1371/journal.pntd.0008934> PMID: 33347450

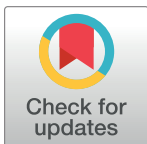

---

## OPEN ACCESS

**Citation:** The *PLOS Neglected Tropical Diseases* Staff (2022) Correction: An investigation into the epidemiology of chikungunya virus across neglected regions of Indonesia. *PLoS Negl Trop Dis* 16(6): e0010502. <https://doi.org/10.1371/journal.pntd.0010502>

**Published:** June 1, 2022

**Copyright:** This is an open access article, free of all copyright, and may be freely reproduced, distributed, transmitted, modified, built upon, or otherwise used by anyone for any lawful purpose. The work is made available under the [Creative Commons CC0](#) public domain dedication.
